# Supplementary material for: Pho4 Is Essential for Dissemination of Cryptococcus neoformans to the Host Brain by Promoting Phosphate Uptake and Growth at Alkaline pH
Source: PubMed Central journal article supplement (PMC5266496; doi:10.1128/msphere.00381-16), 2017-01-25

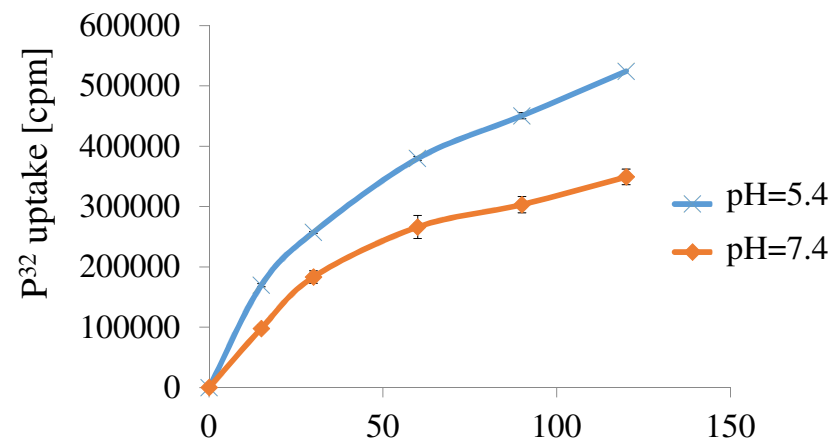

Supplement: sph001172224sf10.pdf [file sph001172224sf10.pdf]
